# Supplementary material for: Unveiling the role of micropores in porous carbon for Li–S batteries using operando SAXS
Source: Royal Society of Chemistry journal article supplement (doi:10.1039/d1cc04270j), 2021-01-01
Supplement: d1cc04270j1.pdf [file d1cc04270j1.pdf]

## Supplementary material

**Synthesis of Ordered Mesoporous Silica: KIT-6.** The ordered mesoporous silica with a cubic *Ia3d* mesostructure, KIT-6, was synthesized as described in a previous report.<sup>1,2</sup> Pluronic triblock copolymer P123 ( $\text{EO}_{20}\text{PO}_{70}\text{EO}_{20}$ , MW = 5,800) was utilized as the structure-directing agent for the synthesis of KIT-6. Typically, 90.0 g of P123 was dissolved in a mixture of 3255 g of distilled water, 90 g of 1-BuOH (99.7 wt%, Aldrich), and 177 g of c-HCl (35 wt%, Aldrich). After stirring at 35 °C for 10 min, 193.5 g of tetraethylorthosilicate (98 wt%, TEOS, Aldrich) was added to this solution under vigorous stirring. The resulting mixture was stirred for 24 h at 35 °C and subsequently kept immobile at 100 °C for 24 h in an oven. The solid product was filtered, washed with doubly distilled water, and dried at 100 °C overnight. The white powder thus obtained was washed with EtOH, dried at 80 °C for 12 h, and finally calcined under static air conditions at 550 °C for 3 h to remove the structure-directing agent.

**Synthesis of Ordered Mesoporous Carbon (OMC).** The procedure for the synthesis of OMC materials is the same as the nano-replication method published elsewhere.<sup>3-5</sup> A precursor solution containing 3.0 g of distilled water, 3.75 g of sucrose (reagent grade, Aldrich), and 0.423 g of sulfuric acid (95%, Samchun) was infiltrated into the mesopores of 3.0 g of KIT-6. The composite material was dried at 100 °C for 6 h and subsequently at 160 °C for 6 h. The infiltration and drying process was repeated once more with an additional 66 wt% precursor solution of the first infiltration. Then, the composite was carbonized at 900 °C for 5 h under  $\text{N}_2$  flow. Finally, the OMC was obtained by removing the inorganic framework using an HF solution, followed by several filtrations and washing with distilled water.

**Infiltration of Sulfur into OMC.** Infiltration of sulfur within the mesopores of OMC (*i.e.*, S/OMC composite) was performed by a melt-assisted diffusion procedure. 0.5 g of the OMC material was mixed with specific quantities of sulfur (99.5 %, Samchun), and the mixture was ground for 10 min, leading to sulfur loadings of 10, 20, 30, 35, 40, 50, 60, 70, 80, and 90 wt%. Afterward, the mixture was heated at 160 °C for 24 h in closed vessels, thereby improving the sulfur distribution within the mesopores of the OMC material *via* capillary diffusion.

**Material Characterization.** Powder X-ray diffraction (XRD) patterns were obtained using a Rigaku X-ray diffractometer (D/MAX Ultima IV) with  $\text{Cu K}\alpha$  radiation at 30 kV and 40 mA.  $\text{N}_2$  adsorption-desorption isotherms were collected on a Micromeritics Tristar ASAP 3020 system at liquid  $\text{N}_2$  temperature, after degassing the samples at room temperature for 24 h to

avoid sublimation of the sulfur in nanopores. The specific Brunauer–Emmett–Teller (BET) surface areas were calculated from the adsorption branches in the range of relative pressure ( $p/p_0$ ) = 0.05–0.20, and the pore size distributions were calculated by the Barrett–Joyner–Halenda (BJH) method using the adsorption branch. The total pore volumes were measured at  $p/p_0$  = 0.99. The morphology of the samples was observed by SEM using a JSM-7100F FE-SEM (JEOL) operating at 15 kV.

**Electrochemical Measurement.** The electrodes were prepared by coating the slurries composed of 35 wt% S/OMC (70 wt %), a conductive agent (Super-P, MMM, 10 wt %), and polyvinylidene fluoride (PVDF, Kureha, 20 wt %) dissolved in N-methyl pyrrolidone (NMP, Aldrich, 99.5 %) on the Al foil substrate. After coating, the electrodes were dried at 50 °C for 24 h under vacuum. Each electrode was assembled using a coin-type half cell (CR2032) with Li metal as the counter and reference electrode in a dry room, and a polyethylene (PE) membrane was used as a separator. 1 M LITFSI dissolved in a mixed solvent of dimethyl ether (DME) and dioxolane (DOL) (1:1, v/v; Panax Etec Co. Ltd.) with 0.3 M LiNO<sub>3</sub> was used as an additive for the electrolyte. The galvanostatic charge–discharge experiments were carried out with a WBCS-3000 battery cycler (WonATech, Korea) at a constant current of 0.1 C (theoretical capacity of 1675 mAh·g<sup>-1</sup> for sulfur).

**Operando SAXS Measurement.** The *operando* SAXS experiments were performed at the BL 9A U-SAXS beamline (PLS-II) using a 2D CCD Detector (Rayonix SX165, USA), which was positioned 2 m away from the sample and measured scattering in the 2 $\theta$  range of 0.3–2.5 ( $\lambda$  = 1.54 Å). The focused beam was 300  $\mu$ m in diameter, and the energy of the beam was 11 keV. Electrochemical measurement patterns of the mesoporous samples during electrochemical cycling were recorded with a 1 s exposure time and 8 s detector readout time. The 2D patterns were scanned with the FIT2D software package to obtain the one-dimensional (1D) patterns in the form of intensity vs. 2 $\theta$ . The storage ring was operated at 3.0 GeV with a ring current of 300 mA.

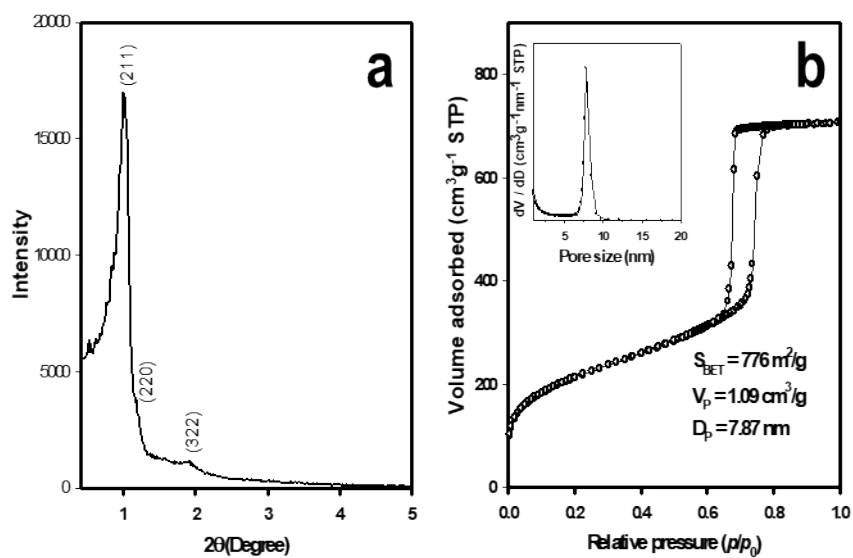

**Fig. S1** (a) Small-angle X-ray scattering patterns; (b)  $N_2$ -adsorption-desorption isotherms; the pore size distribution was calculated by the BJH method (inset) for the KIT-6 template material.

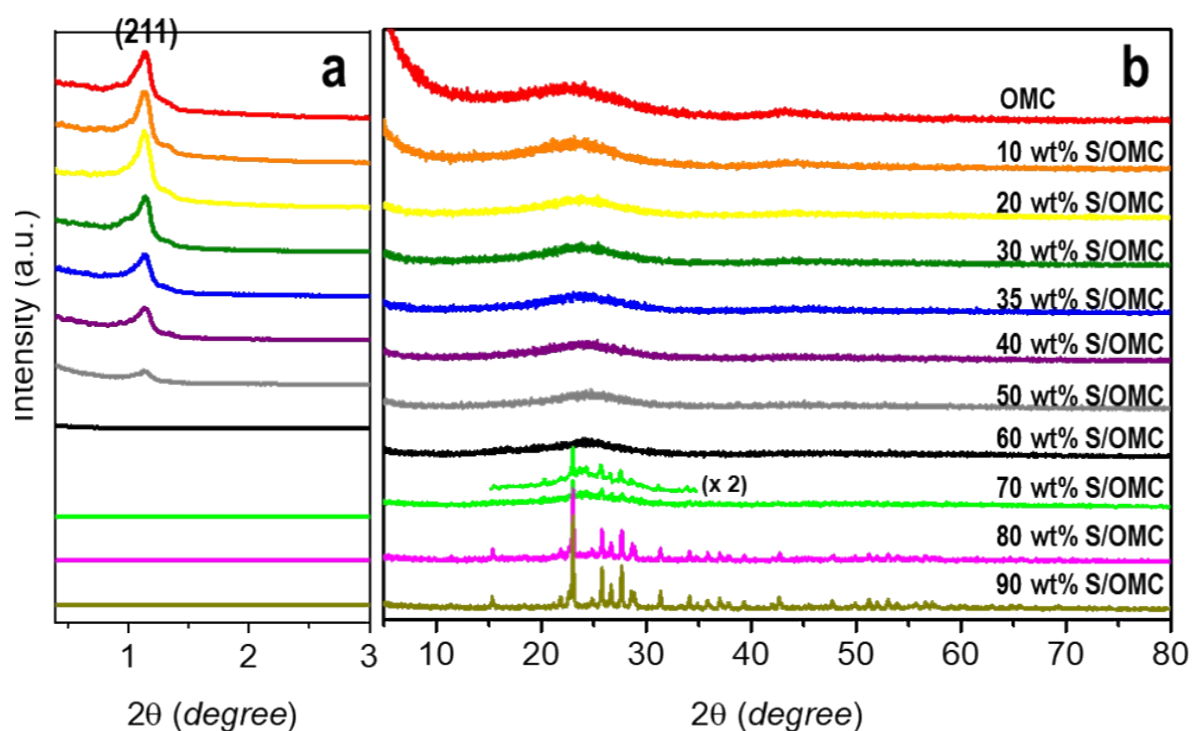

**Fig. S2** (a) Small-angle X-ray scattering patterns; (b) wide-angle XRD patterns of OMC (red), 10 wt% S/OMC (orange), 20 wt% S/OMC (yellow), 30 wt% S/OMC (green), 35 wt% S/OMC (blue), 40 wt% S/OMC (purple), 50 wt% S/OMC (gray), 60 wt% S/OMC (black), 70 wt% S/OMC (light green), 80 wt% S/OMC (pink), and 90 wt% S/OMC (dark yellow).

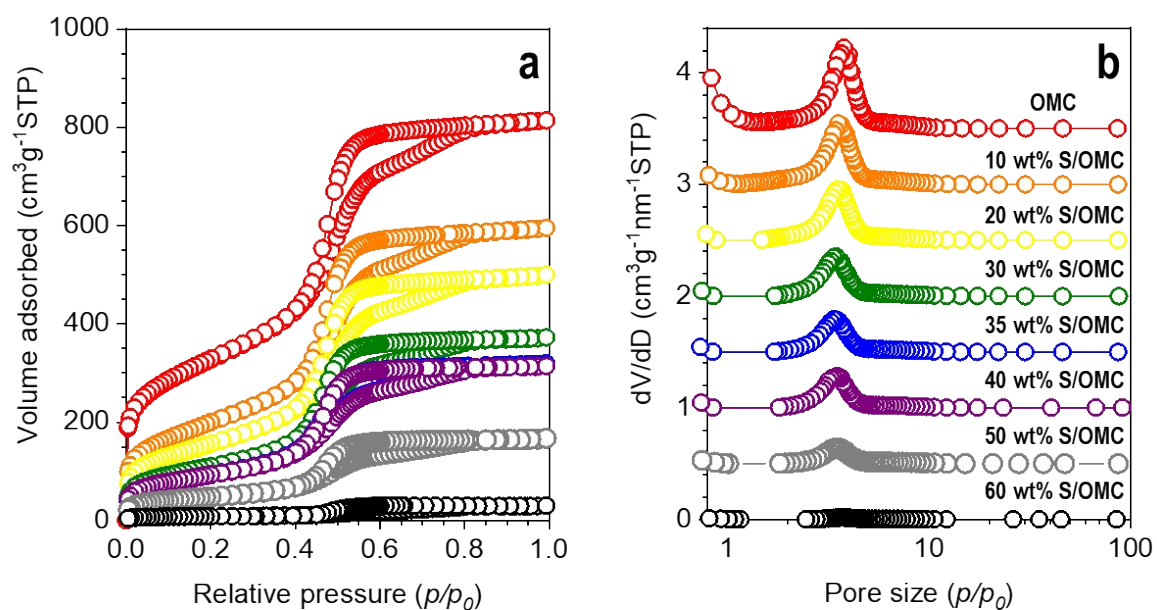

**Fig. S3** (a)  $N_2$ -adsorption-desorption isotherms; (b) pore size distribution calculated by the BJH method for OMC (red), 10 wt% S/OMC (orange), 20 wt% S/OMC (yellow), 30 wt% S/OMC (green), 35 wt% S/OMC (blue), 40 wt% S/OMC (purple), 50 wt% S/OMC (gray), and 60 wt% S/OMC (black).

|              | $S_{\text{BET}}^{\text{a}}$<br>( $\text{m}^2/\text{g}$ ) | $V_{\text{micro}}^{\text{b}}$<br>( $\text{cm}^3/\text{g}$ ) | $V_{\text{meso}}^{\text{c}}$<br>( $\text{cm}^3/\text{g}$ ) | $V_{\text{tot}}^{\text{d}}$<br>( $\text{cm}^3/\text{g}$ ) | reduced<br>$V_{\text{micro}}$ (%) | reduced<br>$V_{\text{meso}}$ (%) |
|--------------|----------------------------------------------------------|-------------------------------------------------------------|------------------------------------------------------------|-----------------------------------------------------------|-----------------------------------|----------------------------------|
| OMC          | 1172                                                     | 0.50                                                        | 0.76                                                       | 1.26                                                      | 0%                                | 0%                               |
| 10 wt% S/OMC | 722                                                      | 0.29                                                        | 0.63                                                       | 0.92                                                      | 42.0%                             | 17.1%                            |
| 20 wt% S/OMC | 559                                                      | 0.23                                                        | 0.54                                                       | 0.77                                                      | 54.0%                             | 28.9%                            |
| 30 wt% S/OMC | 395                                                      | 0.16                                                        | 0.44                                                       | 0.60                                                      | 68.0%                             | 42.1%                            |
| 35 wt% S/OMC | 334                                                      | 0.10                                                        | 0.42                                                       | 0.52                                                      | 80.0%                             | 44.7%                            |
| 40 wt% S/OMC | 322                                                      | 0.09                                                        | 0.31                                                       | 0.40                                                      | 82.0%                             | 59.2%                            |
| 50 wt% S/OMC | 172                                                      | 0.07                                                        | 0.19                                                       | 0.26                                                      | 86.0%                             | 75.0%                            |
| 60 wt% S/OMC | 29                                                       | 0.01                                                        | 0.04                                                       | 0.05                                                      | 98.0%                             | 94.7%                            |
| 70 wt% S/OMC | -                                                        | -                                                           | -                                                          | -                                                         | -                                 | -                                |
| 80 wt% S/OMC | -                                                        | -                                                           | -                                                          | -                                                         | -                                 | -                                |
| 90 wt% S/OMC | -                                                        | -                                                           | -                                                          | -                                                         | -                                 | -                                |

[a] BET surface area was calculated by BET method in the range of  $p/p_0 = 0.05-0.20$

[b] Micropore volume with pore diameters less than 2 nm was calculated at  $p/p_0 = 0.16$  using Horvath-Kawazoe formula.

[c] Mesopore volume with pore diameters larger than 2 nm was calculated by subtracting micropore volume from total pore volume.

[d] Total pore volume estimated from the  $\text{N}_2$  sorption isotherms at  $p/p_0 = 0.99$ .

**Table. S1** Physical properties of OMC and S/OMCs.

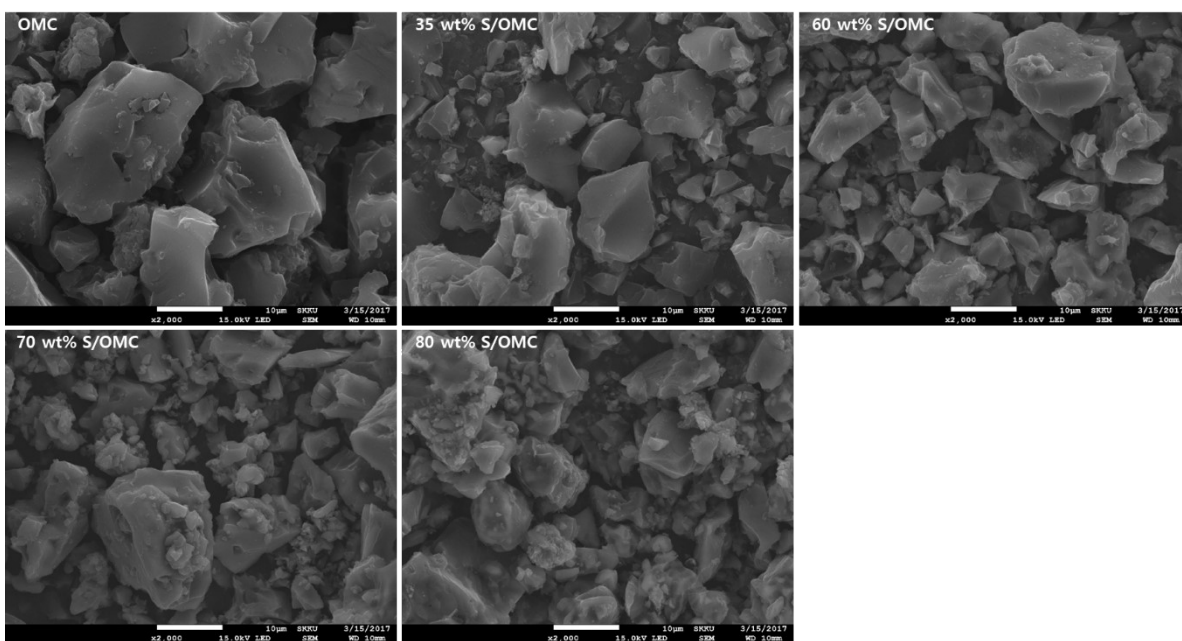

**Fig. S4** SEM images of OMC, 35 wt% S/OMC, 60 wt% S/OMC, 70 wt% S/OMC, and 80 wt% S/OMC.

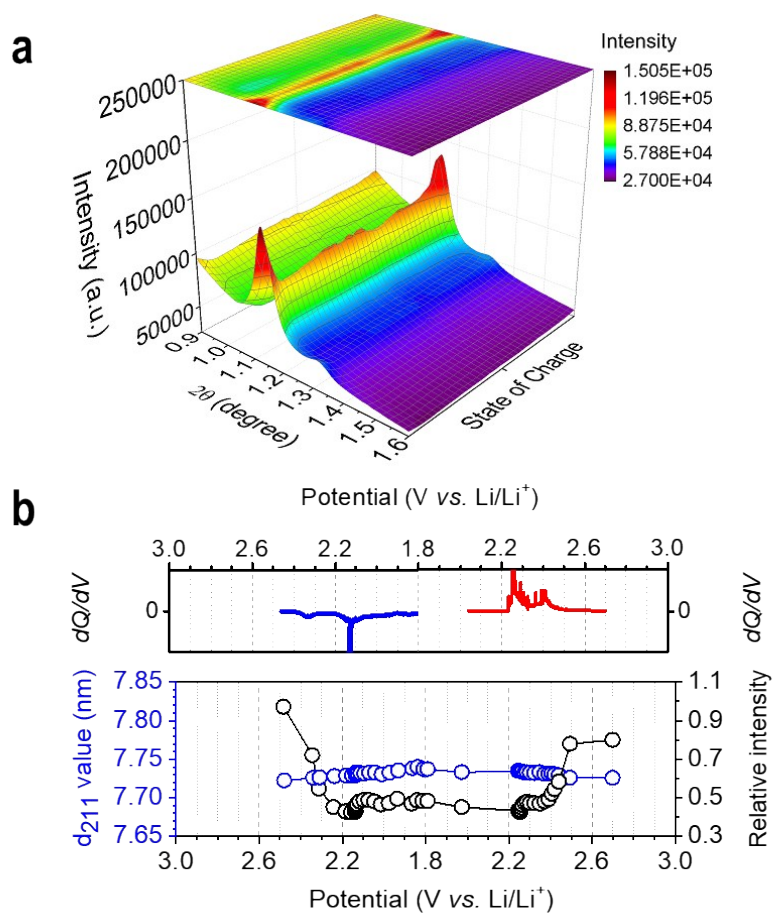

**Fig. S5** (a) *Operando* SAXS spectra of 35 wt% S/OMC at 2nd cycle; (b) differential capacity vs. potential plot ( $dQ/dV$ ) and the corresponding changes in lattice parameter and resolved peak intensity ratio calculated from the (211) reflection.

## References

- 1 T. W. Kim, F. Kleitz, B. Paul and R. Ryoo, *J. Am. Chem. Soc.*, 2005, 127, 7601–7610.
- 2 F. Kleitz, S. H. Choi and R. Ryoo, *Chem. Commun.*, 2003, 3, 2136–2137.
- 3 H. I. Lee, J. H. Kim, D. J. You, J. E. Lee, J. M. Kim, W. S. Ahn, C. Pak, S. H. Joo, H. Chang and D. Seung, *Adv. Mater.*, 2008, 20, 757–762.
- 4 M. Kruk, M. Jaroniec, S. H. Joo and R. Ryoo, *J. Phys. Chem. B*, 2003, 107, 2205–2213.
- 5 S. Jun, Sang Hoon Joo, R. Ryoo, M. Kruk, M. Jaroniec, Z. Liu, T. Ohsuna and O. Terasaki, *J. Am. Chem. Soc.*, 2000, 122, 10712–10713.
